# Supplementary material for: Discovery of potential targets of Triptolide through inverse docking in ovarian cancer cells
Source: PeerJ journal article supplement (doi:10.7717/peerj.8620), 2020-03-18
Supplement: Data_set_for_figure_2.zip [file Data_set_for_figure_2.zip]

positive

negative

10NM

20NM

| **Group** | **green fluorescence(%)** |
| --- | --- |
| positive | 30.72 |
| nagetive | 13.20 |
| 10nM | 26.25 |
| 20nM | 40.73 |
